# Supplementary material
Source: publisher figshare collection journal article supplement (https://karger.figshare.com/ndownloader/files/40217509)
Supplement: Supplementary file 1 [file 40217509]

**Supplementary Table 1**. Pearson’s correlation analysis of the mean fractional anisotropy value of regions of interest and *5-HTTLPR* methylation levels in patients with panic disorder

| Mean FA value | DNA methylation level at *5-HTTLPR* 5 CpG sites | |
| --- | --- | --- |
|
| *r* | *p*-value |
| Genu of corpus callosum | 0.048 | 0.720 |
| Body of corpus callosum | 0.146 | 0.270 |
| Splenium of corpus callosum | 0.182 | 0.167 |
| Fornix (column and body) | - 0.157 | 0.236 |
| Fornix (cres), left | - 0.165 | 0.213 |
| Fornix (cres), right | - 0.082 | 0.538 |
| Superior longitudinal fasciculus, left | 0.319 | 0.014 |
| Superior longitudinal fasciculus, right | 0.410 | 0.001 |
| Tapetum, left | 0.227 | 0.083 |
| Tapetum, right | 0.151 | 0.252 |
| Abbreviations: PD, panic disorder; SD, standard deviation; FA, fractional anisotropy. | | |
